# Supplementary material for: Light Environment Influences Developmental Programming of the Metabolic and Visual Systems in Mice
Source: PubMed Central journal article supplement — Invest Ophthalmol Vis Sci. 2021 Apr 16;62(4):22. doi: 10.1167/iovs.62.4.22 (PMC8083116; doi:10.1167/iovs.62.4.22), 2021-04-16
Supplement: iovs-62-4-22_s001.pdf [file iovs-62-4-22_s001.pdf]

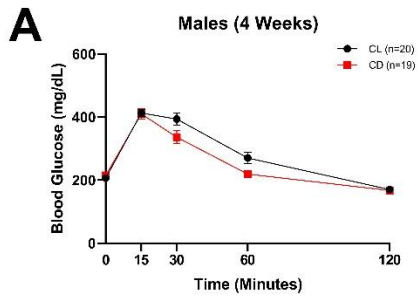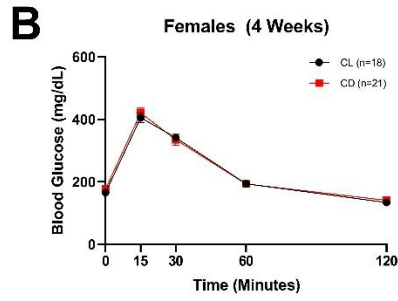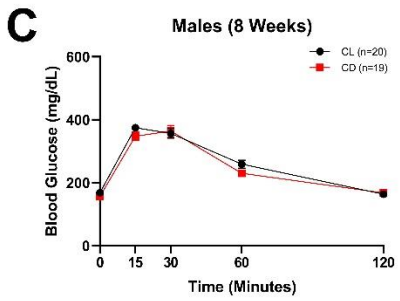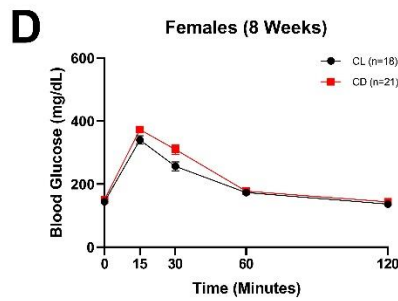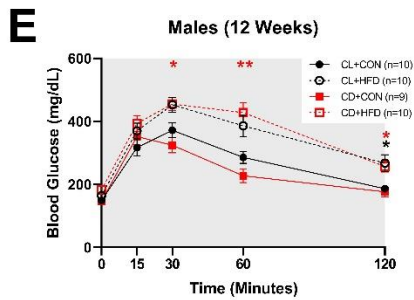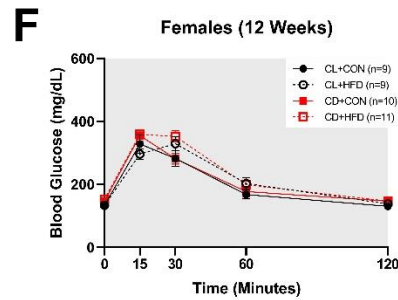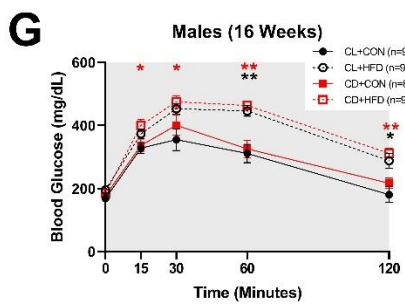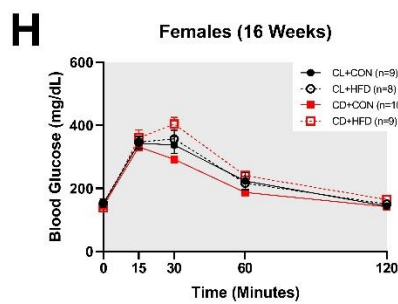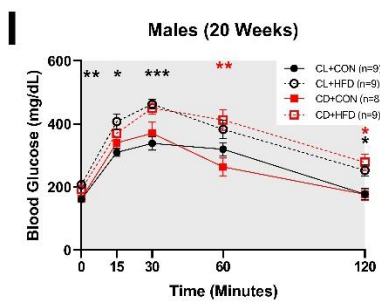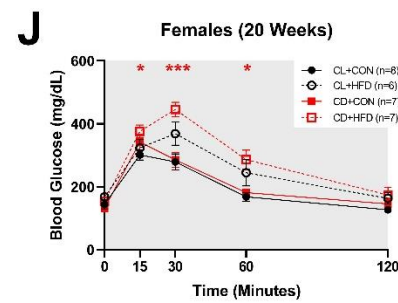

**Supplemental Figure 1.** Males on HFD have abnormal glucose tolerance earlier than females. Male and female glucose tolerance at **(A-B)** 4 weeks of age and **(C-D)** 8 weeks of age, prior to diet treatment. **(E-F)** Male and female glucose tolerance at 12 weeks of age; CD+HFD males developed hyperglycemia by 15 minutes and remained elevated while CL+HFD males didn't show significantly increased blood glucose until 120 minutes ( $p < 0.05$ ). **(G-H)** Male and female glucose tolerance at 16 weeks of age; CD+HFD males developed hyperglycemia by 15 minutes and remained elevated compared to CL+HFD males which wasn't significantly elevated until 60 minutes ( $p < 0.05$ ). **(I-J)** Male and female glucose tolerance at 20 weeks of age; CD+HFD males developed hyperglycemia by 60 minutes and CL+HFD males by baseline ( $p < 0.05$ ); CD+HFD females had hyperglycemia by 15 minutes and remained elevated ( $p < 0.05$ ). Data are presented as mean  $\pm$  SEM and analyzed by 2-way ANOVAs with Dunnett tests. \* $p < 0.05$  \*\* $p < 0.01$  \*\*\* $p < 0.001$  \*\*\*\* $p < 0.0001$  vs CL+CON group. Black asterisks indicate CL+HFD group and red asterisks indicate CD+HFD groups. Grey shading indicates period of diet treatment. For males, CL+CON  $n = 9-10$ , CL+HFD  $n = 9-10$ , CD+CON  $n = 8-9$ , CD+HFD  $n = 9-10$  at each timepoint; for females, CL+CON  $n = 8-9$ , CL+HFD  $n = 6-9$ , CD+CON  $n = 7-10$ , CD+HFD  $n = 7-11$  at each timepoint.
