# Supplementary material for: Light Environment Influences Developmental Programming of the Metabolic and Visual Systems in Mice
Source: PubMed Central journal article supplement — Invest Ophthalmol Vis Sci. 2021 Apr 16;62(4):22. doi: 10.1167/iovs.62.4.22 (PMC8083116; doi:10.1167/iovs.62.4.22), 2021-04-16
Supplement: iovs-62-4-22_s002.pdf [file iovs-62-4-22_s002.pdf]

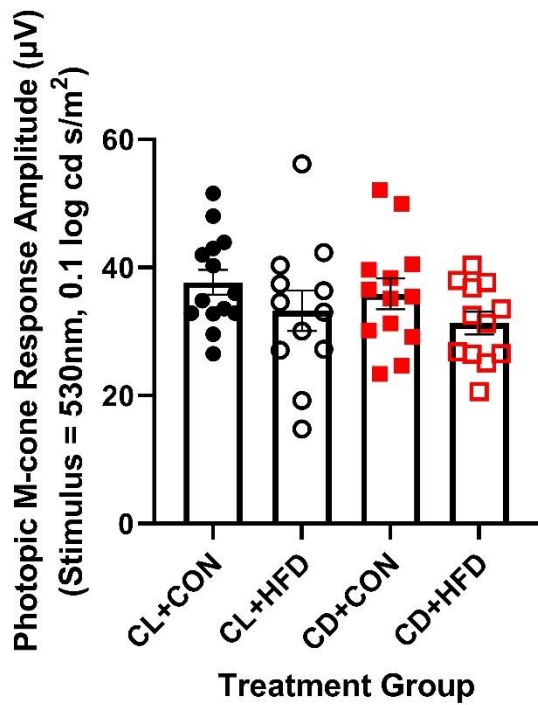

**Supplemental Figure 2.** There are no differences in response to photopic green light stimuli after developmental circadian disruption or diet treatment. Graph showing b-wave amplitude of photopic M-cone response to green light (530nm, flash stimulus = 0.1 log cd s/m<sup>2</sup> after 10-minute light adaptation at 1.5 log cd s/m<sup>2</sup>) at 21 weeks of age (1-way ANOVA,  $F(3, 47) = 1.47, p=0.24$ ), CL+CON n=14, CL+HFD n=12, CD+CON n=13, CD+HFD n=12.
