# Supplementary material for: Light Environment Influences Developmental Programming of the Metabolic and Visual Systems in Mice
Source: PubMed Central journal article supplement — Invest Ophthalmol Vis Sci. 2021 Apr 16;62(4):22. doi: 10.1167/iovs.62.4.22 (PMC8083116; doi:10.1167/iovs.62.4.22), 2021-04-16
Supplement: iovs-62-4-22_s003.pdf [file iovs-62-4-22_s003.pdf]

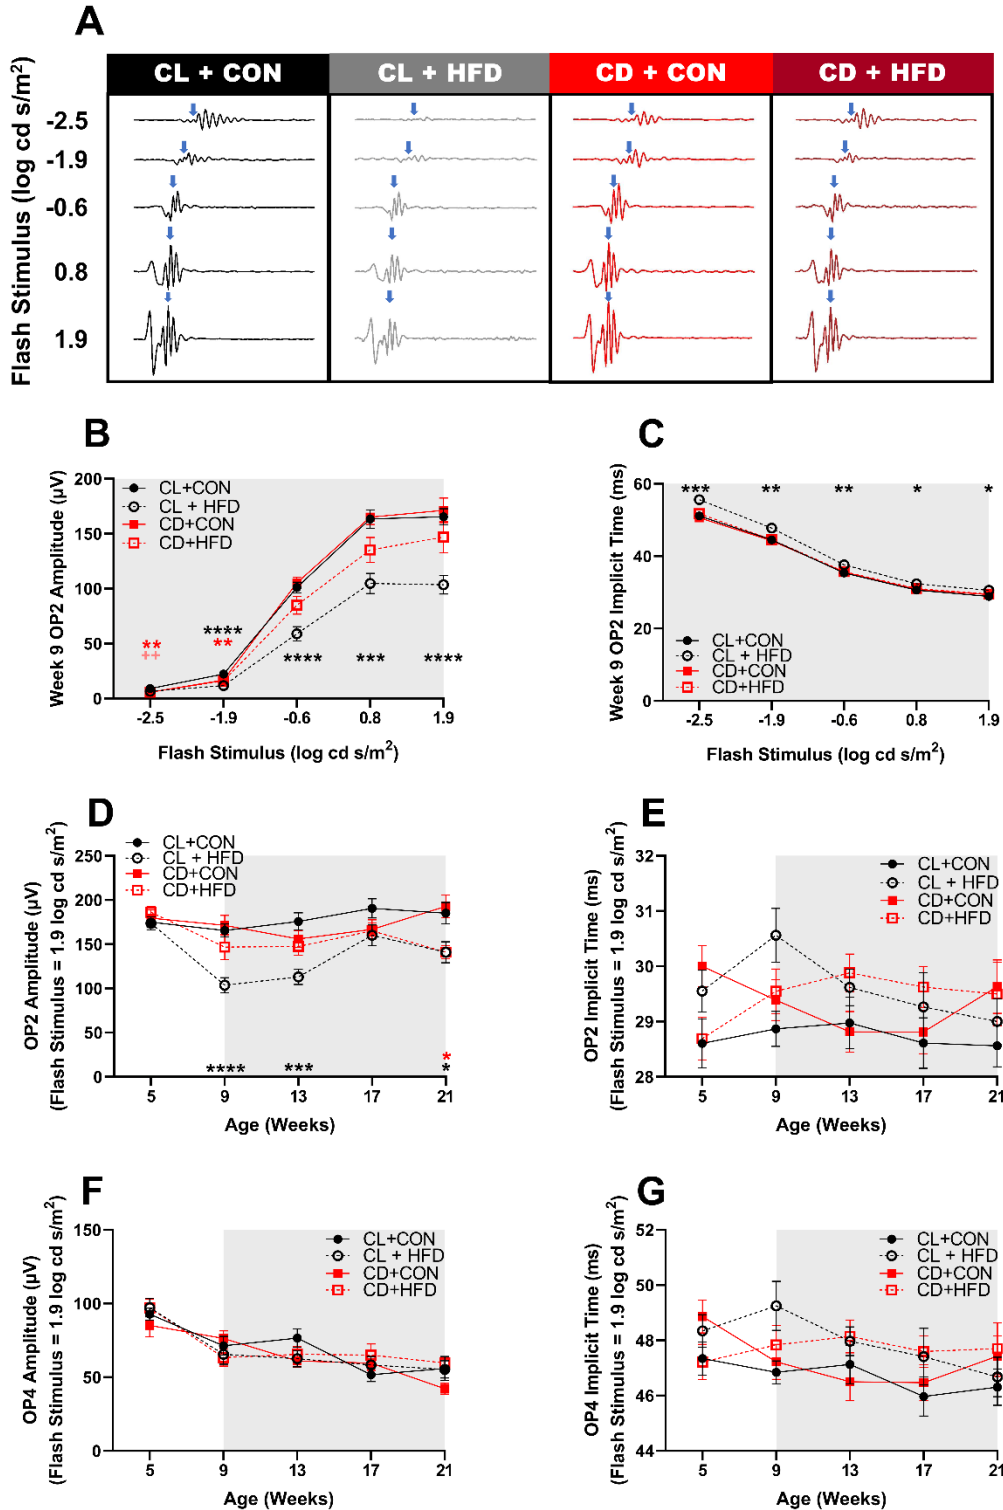

**Supplemental Figure 3.** HFD treatment and developmental circadian disruption impair ERG oscillatory potential (OP) amplitudes. (A) OP waveforms representative of OP2 at 9 weeks of age (1 week after HFD) in response to scotopic stimuli show visible amplitude deficits in the CL+HFD group. Blue arrows indicate the peak for the OP2

wave. **(B)** At 9 weeks of age, the CL+HFD group had both decreased OP2 amplitudes (2-way ANOVA, group\*step:  $F(12, 280) = 6.33, p < 0.0001$ ) and **(C)** delayed OP2 implicit times (2-way ANOVA, group\*step:  $F(12, 280) = 5.62, p < 0.0001$ ), as shown in the intensity response curves. Over time, the CL+HFD group had decreased **(D)** OP2 amplitudes (mixed-effects, group\*time:  $F(12, 260) = 2.44, p = 0.005$ ) at 9, 13, and 21 weeks of age; the CD+HFD group also developed OP2 deficits at 21 weeks. There were no differences in **(E)** OP2 implicit times (mixed-effects, group\*time:  $F(12, 260) = 1.54, p = 0.11$ ), **(F)** OP4 amplitudes (mixed-effects, group\*time:  $F(12, 260) = 1.38, p = 0.18$ ), or **(G)** OP4 implicit times (mixed-effects, group\*time:  $F(12, 260) = 1.24, p = 0.26$ ). Data are presented as mean  $\pm$  SEM and analyzed by 2-way ANOVAs or mixed models with Dunnett tests. \* $p < 0.05$  \*\* $p < 0.01$  \*\*\* $p < 0.001$  \*\*\*\* $p < 0.0001$  vs CL+CON group. Black asterisks indicate CL+HFD group, red asterisks indicate CD+HFD, and pink crosses indicate CD+CON group. Grey shading indicates period of diet treatment. For each timepoint, CL+CON  $n = 16-19$ , CL+HFD  $n = 14-19$ , CD+CON  $n = 15-19$ , CD+HFD  $n = 15-21$ .
